# Supplementary material for: Intermolecular photoinduced electron-transfer of 1,8-naphthalimides in protic polar solvents
Source: Royal Society of Chemistry journal article supplement (doi:10.1039/b802074d), 2008-01-01
Supplement: b802074d.pdf [file b802074d.pdf]

## Supporting Information

# Intermolecular Photoinduced Electron-Transfer of 1,8-Naphthalimides in Protic Polar Solvents

Dae Won Cho,<sup>a,b</sup> Mamoru Fujitsuka,<sup>a</sup> Ung Chan Yoon,<sup>c</sup> and Tetsuro Majima<sup>\*a</sup>

<sup>a</sup> *The Institute of Scientific and Industrial Research (SANKEN), Osaka University, Mihogaoka 8-1, Ibaraki, Osaka 567-0047, Japan. Fax: +81- 6-6879-8499; Tel:+81-6-6879-8495; E-mail:*

*[majima@saken.osaka-u.ac.jp](mailto:majima@saken.osaka-u.ac.jp)*

<sup>b</sup> *Department of Chemistry, Chosun University, Gwangju 501-759, Korea. Fax: +82- 62-230-7979; Tel: +82- 62-230-6677; E-mail: [dwcho@chosun.ac.kr](mailto:dwcho@chosun.ac.kr)*

<sup>c</sup> *Department of Chemistry and the Chemistry Institute for Functional Materials, Pusan National University, Pusan 609-735, Korea. E-mail: [ucyoon@pusan.ac.kr](mailto:ucyoon@pusan.ac.kr)*

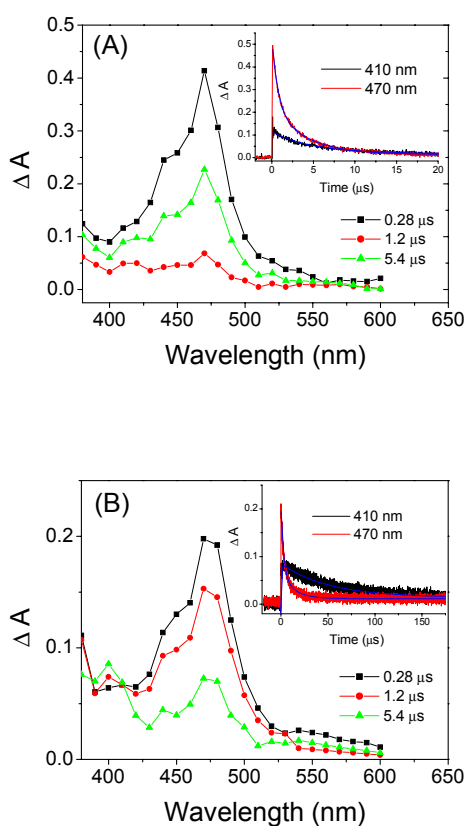

**Fig. S1** Transient absorption spectra observed at various delay times during the laser flash photolysis of NI-O ( $2.9 \times 10^{-5}$  M) in (A) CH<sub>3</sub>CN and (B) H<sub>2</sub>O/CH<sub>3</sub>CN (v/v = 1:1) with a 355 nm excitation pulse. The inset shows kinetic traces of  $\Delta A$  at 410 and 470 nm: (A) the decay times are 4.2 and 4.7  $\mu$ s monitored at 410 and 470 nm, respectively; (B) the decay times are 59.4 and 5.5  $\mu$ s monitored at 410 and 470 nm, respectively.

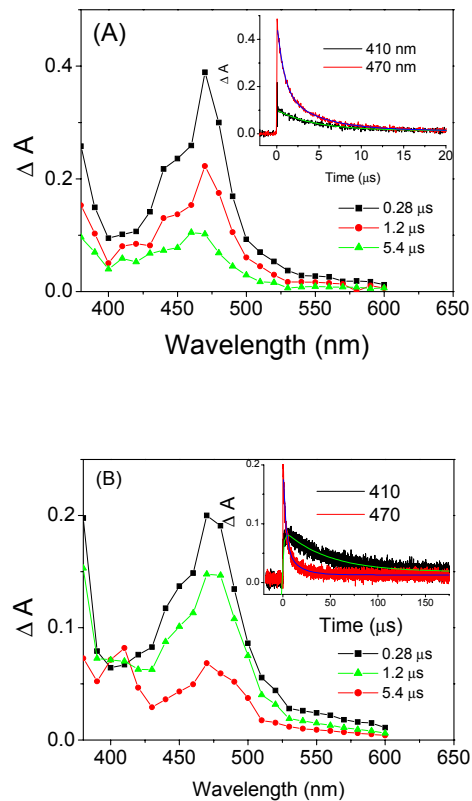

**Fig. S2** Transient absorption spectra observed at various delay times during the laser flash photolysis of NI-O3 ( $2.9 \times 10^{-5}$  M) in (A) CH<sub>3</sub>CN and (B) H<sub>2</sub>O/CH<sub>3</sub>CN (v/v = 1:1) with a 355 nm excitation pulse. The inset shows kinetic traces of  $\Delta A$  at 410 and 470 nm: (A) the decay times are 4.5 and 4.5  $\mu$ s monitored at 410 and 470 nm, respectively; (B) the decay times are 50.5 and 5.5  $\mu$ s monitored at 410 and 470 nm, respectively.

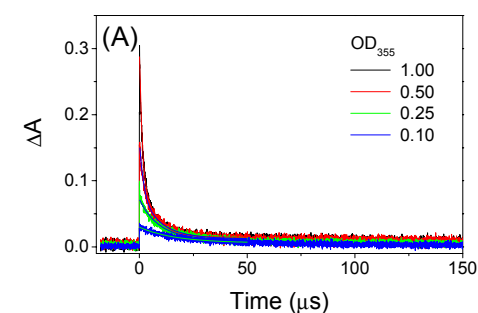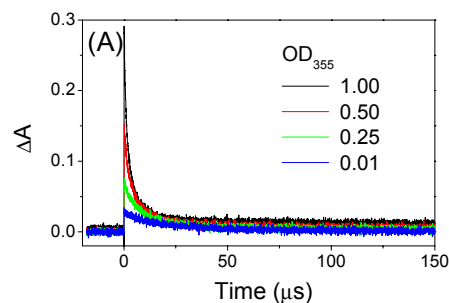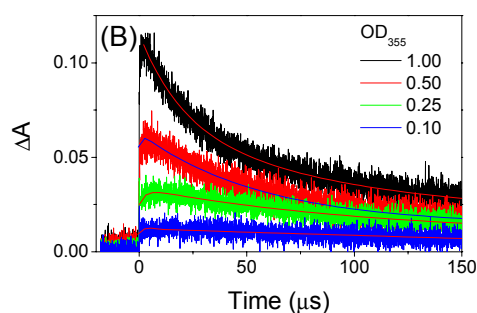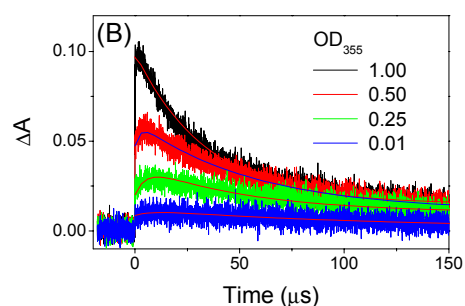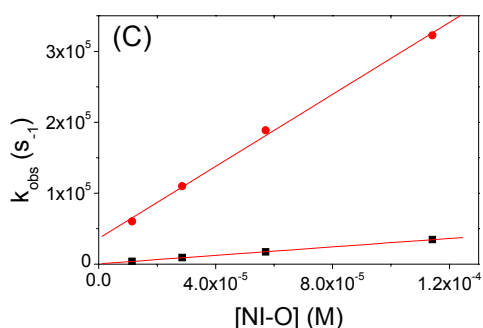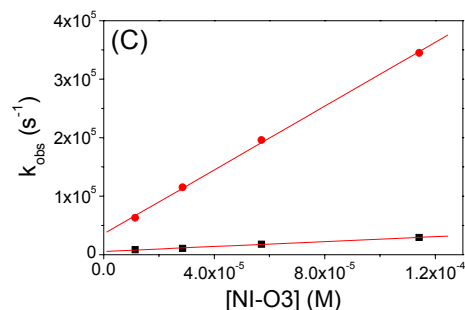

**Fig. S3** Triplet decay of (A) NI-O3 at 470 nm and (B) concomitant growth of transient at 410 nm in H<sub>2</sub>O/CH<sub>3</sub>CN according to change of concentration of NI [OD<sub>355 nm</sub> = 1.00 (1.1×10<sup>-4</sup> M), 0.50 (5.7×10<sup>-5</sup> M), 0.25 (2.9×10<sup>-5</sup> M), and 0.10 (1.4×10<sup>-5</sup> M)]. (C) Plots of *k*<sub>obs</sub> vs. [NI-O] for self-quenching of NI derivatives monitored at 470 nm (circles) and at 410 nm (squares) in H<sub>2</sub>O/CH<sub>3</sub>CN.

**Fig. S4** Triplet decay of (A) NI-O3 at 470 nm and (B) concomitant growth of transient at 410 nm in H<sub>2</sub>O/CH<sub>3</sub>CN according to change of concentration of NI [OD<sub>355 nm</sub> = 1.00 (1.1×10<sup>-4</sup> M), 0.50 (5.7×10<sup>-5</sup> M), 0.25 (2.9×10<sup>-5</sup> M), and 0.10 (1.4×10<sup>-5</sup> M)]. (C) Plots of *k*<sub>obs</sub> vs. [NI-O3] for self-quenching of NI derivatives monitored at 470 nm (circles) and at 410 nm (squares) in H<sub>2</sub>O/CH<sub>3</sub>CN.

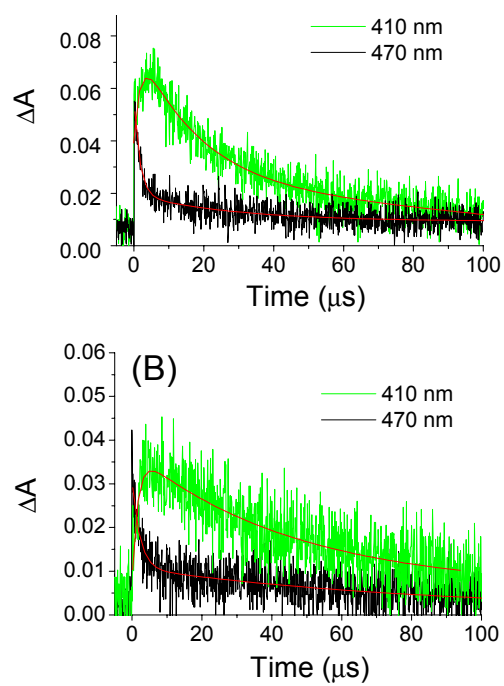

**Fig. S5** Triplet decay of (A) NI-C8-PTZ ( $2.9 \times 10^{-5}$  M) and (B) NI-O3-PTZ ( $2.9 \times 10^{-5}$  M) monitored at 470 nm and concomitant growth of transient at 410 nm (B) in  $H_2O/CH_3CN$ .
